# Supplementary material for: Prebiotic Systems Containing Anthocyanin-Rich Pomegranate Flower Extracts with Antioxidant and Antidiabetic Effects
Source: MDPI journal article supplement (doi:10.3390/pharmaceutics16040526), 2024-04-10
Supplement: s1 [file s1]

## Supplementary Materials

**Table S1.** FT-IR analysis: selected characteristic bands (in  $\text{cm}^{-1}$ ) of pomegranate lyophilizate (PL). Functional group assignment and phytocompounds identified based on literature.

| Wavelength<br>( $\text{cm}^{-1}$ ) | Functional group assignment                       | Phytocompounds identified |
|------------------------------------|---------------------------------------------------|---------------------------|
| 870                                | P-O-C stretching vibration                        | aromatic phosphates       |
| 922                                | P-O-C stretching vibration                        | aromatic phosphates       |
| 1026                               | phosphate ion                                     | phosphate compound        |
| 1070                               | phosphate ion                                     | phosphate compound        |
| 1186                               | C-N stretching vibration                          | amines                    |
| 1331                               | $\text{CH}_3$ deformation                         | alkanes                   |
| 1447                               | $\text{CH}_2$ bending                             | aldehydes and ketones     |
| 1516                               | skeletal vibration of the aromatic ring           | -                         |
| 1605                               | C=O stretching vibration, ketone group            | ketone compound           |
| 1711                               | C=O stretching vibration                          | carbonyl                  |
| 2943                               | O-H stretching vibration, acidic                  | carboxylic acids          |
| 3233                               | O-H stretching vibration, hydroxy group, H-bonded | poly hydroxy compound     |

**Table S2.** FT-IR analysis: Characteristic absorption bands (in  $\text{cm}^{-1}$ ) of the HP- $\gamma$ -CD,  $\alpha$ -CD, Me- $\beta$ -CD, Inu, AGu. Functional group assignment based on literature

| Substance           | Wavelength<br>(cm <sup>-1</sup> ) | Functional group assignment                                                                      | Reference |
|---------------------|-----------------------------------|--------------------------------------------------------------------------------------------------|-----------|
| 1. HP- $\gamma$ -CD | 581                               | O-H and C-H in-plane and out-of-plane bending vibrations, C-C and C-O stretching vibrations      | [1]       |
|                     | 611                               |                                                                                                  |           |
|                     | 706                               |                                                                                                  |           |
|                     | 758                               |                                                                                                  |           |
|                     | 851                               | C-C-H bending vibrations, C-O and C-C stretching vibrations                                      |           |
|                     | 941                               | skeletal vibration involving $\alpha$ -1,4 linkage                                               |           |
|                     | 1018                              | O-C-H, C-C-H, and C-C-O bending vibrations                                                       |           |
|                     | 1080                              | C-O and C-C stretching vibrations, C-O-C bending vibrations                                      |           |
|                     | 1152                              | C-O and C-C stretching vibrations, C-O-C bending vibrations                                      |           |
|                     | 1335                              | coupled C-C-H, C-O-H, and H-C-H bending vibrations                                               |           |
|                     | 1369                              | C-H from CH <sub>2</sub> and O-H bending vibrations                                              |           |
|                     | 1418                              | C-H from CH <sub>2</sub> bending vibrations                                                      |           |
|                     | 2928                              | C-H stretching vibrations                                                                        |           |
|                     | 3348                              | O-H stretching vibrations                                                                        |           |
| 2. $\alpha$ -CD     | 569                               | O-H and C-H in-plane and out-of-plane bending vibrations, C-C and C-O bond stretching vibrations | [2-5]     |
|                     | 604                               |                                                                                                  |           |
|                     | 710                               |                                                                                                  |           |
|                     | 762                               |                                                                                                  |           |
|                     | 843                               |                                                                                                  |           |
|                     | 868                               | -C-C-O stretching vibration                                                                      |           |
|                     | 939                               |                                                                                                  |           |
|                     | 951                               |                                                                                                  |           |
|                     | 1024                              |                                                                                                  |           |
|                     | 1076                              |                                                                                                  |           |
|                     | 1155                              | -C-O-C antisymmetric stretching vibration                                                        |           |

|                    |           |                                                                                                                                      |         |
|--------------------|-----------|--------------------------------------------------------------------------------------------------------------------------------------|---------|
| 3. Me- $\beta$ -CD |           | of the C–O–C glycosidic bridge                                                                                                       | [6–8]   |
|                    | 1200–1500 | O–H, C–H and H–C–H bonds                                                                                                             |         |
|                    | 1406      | bending of –C–H from –CH <sub>2</sub> and bending of O–H                                                                             |         |
|                    | 1641      | O–H oscillating vibration                                                                                                            |         |
|                    | 2926      | C–H stretching vibration from –CH <sub>2</sub>                                                                                       |         |
|                    | 3333      | O–H stretching vibration                                                                                                             |         |
|                    | 569       | framework vibration of $\alpha$ -pyranose                                                                                            |         |
|                    | 604       |                                                                                                                                      |         |
|                    | 706       |                                                                                                                                      |         |
|                    | 756       | in-plane and out-of-plane bending vibrations of O–H, and C–H                                                                         |         |
|                    | 856       | bonds, C–C and C–O bond stretching vibrations                                                                                        |         |
|                    | 916       |                                                                                                                                      |         |
|                    | 964       | framework vibration of $\alpha$ -pyranose                                                                                            |         |
|                    | 1020      |                                                                                                                                      |         |
|                    | 1082      | C–H and C–O stretching vibrations                                                                                                    |         |
|                    | 1155      |                                                                                                                                      |         |
| 4. Inu             | 1200–1500 | O–H, C–H and H–C–H bending vibrations                                                                                                | [9–14]  |
|                    | 1638      | crystallized water                                                                                                                   |         |
|                    | 2833      | methoxy (O–CH <sub>3</sub> ) group stretching                                                                                        |         |
|                    | 2934      | C–H stretching vibration                                                                                                             |         |
|                    | 3408      | O–H stretching vibration                                                                                                             |         |
|                    | 598       | presence of pyranose rings in polymer chain                                                                                          |         |
|                    | 822       | 2-ketose (pyranose or furanose)                                                                                                      |         |
|                    | 870       | CH <sub>2</sub> ring vibration of $\beta$ -anomer                                                                                    |         |
|                    | 932       | $\alpha$ -D-Glucopyranosyl residue in chain, C–C and C–O stretching, C–O–H and C–O–C deformation modes of oligo- and polysaccharides |         |
|                    | 988       | C–C and C–O stretching, C–O–H and C–O–C deformation modes of oligo- and polysaccharides                                              |         |
|                    | 1018      | C–O stretching vibrations in the furanose ring                                                                                       |         |
|                    | 1119      | presence of ketal groups (C–O–C–O–C), C–O–C stretching vibrations in the furanose ring                                               |         |
|                    | 1200–1400 | C–H bending vibrational modes                                                                                                        |         |
|                    | 2886      | C–H from CH <sub>2</sub> asymmetric stretching vibrations                                                                            |         |
|                    | 2930      | C–H from CH <sub>2</sub> stretching vibrations                                                                                       |         |
| 5. AGu             | 3314      | OH group                                                                                                                             | [15,16] |
|                    | 500–900   | CCO, COC, symmetrical and asymmetrical ring breathing vibration                                                                      |         |
|                    | 900–1200  | fingerprint of carbohydrates                                                                                                         |         |
|                    | ~1400     | COO–symmetric stretching vibration                                                                                                   |         |
|                    | 1599      | COO–asymmetric stretching vibration                                                                                                  |         |
|                    | 2928      | C–H stretching vibration                                                                                                             |         |
|                    | 3333      | O–H stretching, characteristic of glucosidic ring                                                                                    |         |

Ad. 1 Peaks are associated with in-plane and out-of-plane bending vibrations of O–H, and C–H bonds as well as C–C and C–O bond stretching vibrations. The most intense bands are recorded at 1018 cm<sup>–1</sup> (O–C–H, C–C–H, and C–C–O bending vibrations), 1080 cm<sup>–1</sup> (C–O and C–C stretching vibrations, C–O–C bending vibrations), and 1152 cm<sup>–1</sup> (C–O and C–C stretching vibrations, C–O–C bending vibrations). Between 1200 cm<sup>–1</sup> and 1500 cm<sup>–1</sup>, peaks at 1335 cm<sup>–1</sup>, 1369 cm<sup>–1</sup> and 1418 cm<sup>–1</sup> can be

distinguished (see Figure 3, red line and Table S2). The band at 2928 cm<sup>-1</sup> corresponds to stretching vibrations of the C–H bonds. The broad band with a maximum of 3348 cm<sup>-1</sup> is associated with the O–H bond stretching vibration.

Ad. 2 Peaks associated with in-plane and out-of-plane bending vibrations of O–H, and C–H bonds as well as C–C and C–O bond stretching vibrations. The most intense bands are recorded at 1024 cm<sup>-1</sup>, 1076 cm<sup>-1</sup>, and 1155 cm<sup>-1</sup>. These are associated with stretching vibrations of the –C–C–O, C–O, and –C–O–C bonds, respectively. Between 1200 cm<sup>-1</sup> and 1500 cm<sup>-1</sup> a complex sequence of peaks attributed mainly to the bending of the O–H, C–H and H–C–H bonds. The band located at 1641 cm<sup>-1</sup> is attributed to the oscillating vibrations of the O–H bonds at the glucose unit at the C4 and C5 carbon and the scissor-like C–H bonds. The band at 2926 cm<sup>-1</sup> corresponds to stretching vibrations of the C–H bonds. The broadband with a maximum of 3333 cm<sup>-1</sup> is associated with the O–H bond stretching vibration.

Ad. 3 Peaks are characterized by the prominent bands in the range of ~570–870 cm<sup>-1</sup> (framework vibration of  $\alpha$ -pyranose, in-plane and out-of-plane bending vibrations of O–H, and C–H bonds, C–C and C–O bond stretching vibrations), intense bands between 1000–1200 cm<sup>-1</sup> (–C–C–O, C–O, and –C–O–C bonds), complex sequence of peaks at about 1200–1500 cm<sup>-1</sup> (O–H, C–H and H–C–H bending vibrations), and three characteristic peaks in the range of 2800–3750 cm<sup>-1</sup> (methoxy (O–CH<sub>3</sub>) group, C–H, and O–H stretching vibrations)

Ad. 4 The FT-IR spectrum of inulin (Inu) shows a lot of absorption bands in the range of ~600–1700 cm<sup>-1</sup> and two characteristic peaks in the range of ~2750–3750 cm<sup>-1</sup>. The peak observed at about 600 cm<sup>-1</sup> confirms the presence of pyranose rings in the polymer chain. Bands at 822 and 870 cm<sup>-1</sup> are attributed to the = C–H ring vibration in the presence of 2-ketofuranose. Between 900 cm<sup>-1</sup> and 1500 cm<sup>-1</sup>, a complex sequence of peaks attributed mainly to the C–C, C–O stretching and C–O–H, C–O–C deformation vibration of various oligo- and polysaccharides. In this range, the most characteristic bands are at 932 cm<sup>-1</sup>, 988 cm<sup>-1</sup>, 1018 cm<sup>-1</sup>, and 1119 cm<sup>-1</sup> (see Table S2). Peaks in the range of 1200–1400 cm<sup>-1</sup> arise from the C–H bending vibrational modes. In the literature, the band between 1500 cm<sup>-1</sup> and 1700 cm<sup>-1</sup> (with a maximum at about 1600 cm<sup>-1</sup>) is described as non-specific for inulin. This band is attributed to the absorption of water, due to the hygroscopic properties of of this homopolysaccharide. Bands at 2886 cm<sup>-1</sup>, 2930 cm<sup>-1</sup>, and 3314 cm<sup>-1</sup> were also observed, and corresponding to the C–H from CH<sub>2</sub> asymmetric stretching, C–H from CH<sub>2</sub> symmetric stretching, and OH group, respectively

Ad. 5 within the range of 500–900 cm<sup>-1</sup> AGu show weak peaks assigned to CCO, COC, symmetrical and asymmetrical ring breathing vibration. The strong peaks observed at 900–1200 cm<sup>-1</sup> are the fingerprints of carbohydrates. At about 1400 cm<sup>-1</sup> was peak characteristic to the COO–symmetric stretching. Whereas, a strong peak at 1599 cm<sup>-1</sup> corresponds to the COO–asymmetric stretching. The peak at 2928 cm<sup>-1</sup> is attributed to the C–H stretching vibration. A broad absorption band at 3333 cm<sup>-1</sup> is attributed to the glucosidic ring and might be due to the stretching vibration of O–H.

## References

1. Misiuk, W.; Jasiuk, E. Study of the Inclusion Interaction of HP- $\gamma$ -Cyclodextrin with Bupropion and Its Analytical Application. *Journal of Molecular Structure* **2014**, *1060*, 272–279.
2. Wei, M.; Davis, W.; Urban, B.; Song, Y.; Porbeni, F.E.; Wang, X.; White, J.L.; Balik, C.M.; Rusa, C.C.; Fox, J. Manipulation of Nylon-6 Crystal Structures with Its  $\alpha$ -Cyclodextrin Inclusion Complex. *Macromolecules* **2002**, *35*, 8039–8044.
3. Saha, B.C.; Saha, S.; Das, K.; Basak, S.; Roy, M.N. Investigation of Inclusion Complexes of Sodium Valproate Inside Into  $\alpha$  and  $\beta$ -Cyclodextrins.

4. Stasiłowicz-Krzemień, A.; Rosiak, N.; Płazińska, A.; Płaziński, W.; Miklaszewski, A.; Tykarska, E.; Cielecka-Piontek, J. Cyclodextrin Derivatives as Promising Solubilizers to Enhance the Biological Activity of Rosmarinic Acid. *Pharmaceutics* **2022**, *14*, 2098, doi:10.3390/pharmaceutics14102098.
5. Ho, B.T.; Joyce, D.C.; Bhandari, B.R. Encapsulation of Ethylene Gas into  $\alpha$ -Cyclodextrin and Characterisation of the Inclusion Complexes. *Food Chemistry* **2011**, *127*, 572–580.
6. Yu, J.-G.; Huang, K.-L.; Liu, S.-Q.; Tang, J.-C. Preparation and Characterization of Soluble Methyl- $\beta$ -Cyclodextrin Functionalized Single-Walled Carbon Nanotubes. *Physica E: Low-Dimensional Systems and Nanostructures* **2008**, *40*, 689–692.
7. Chao, J.; Liu, Y.; Zhang, Y.; Zhang, J.; Zhang, Y.; Guo, Z.; Wang, Y.; Qin, L.; Zhang, B. Investigation of the Inclusion Behavior of Ofloxacin with Methyl- $\beta$ -Cyclodextrin. *Journal of Molecular Liquids* **2014**, *200*, 404–409.
8. Siva, S.; Li, C.; Cui, H.; Meenatchi, V.; Lin, L. Encapsulation of Essential Oil Components with Methyl- $\beta$ -Cyclodextrin Using Ultrasonication: Solubility, Characterization, DPPH and Antibacterial Assay. *Ultrasonics Sonochemistry* **2020**, *64*, 104997.
9. Saud, K.T.; Xu, J.; Wilkanowicz, S.; He, Y.; Moon, J.J.; Solomon, M.J. Electrosprayed Microparticles from Inulin and Poly (Vinyl) Alcohol for Colon Targeted Delivery of Prebiotics. *Food Hydrocolloids* **2023**, *140*, 108625.
10. Romano, N.; Araujo-Andrade, C.; Lecot, J.; Mobili, P.; Gómez-Zavaglia, A. Infrared Spectroscopy as an Alternative Methodology to Evaluate the Effect of Structural Features on the Physical-Chemical Properties of Inulins. *Food Research International* **2018**, *109*, 223–231.
11. Petkova, N.T.; Sherova, G.; Denev, P.P. Characterization of Inulin from Dahlia Tubers Isolated by Microwave and Ultrasound-Assisted Extractions. *International Food Research Journal* **2018**, *25*.
12. Akram, W.; Garud, N. Optimization of Inulin Production Process Parameters Using Response Surface Methodology. *Future Journal of Pharmaceutical Sciences* **2020**, *6*, 1–9.
13. Pontes, A.G.O.; Silva, K.L.; da Cruz Fonseca, S.G.; Soares, A.A.; de Andrade Feitosa, J.P.; Braz-Filho, R.; Romero, N.R.; Bandeira, M.A.M. Identification and Determination of the Inulin Content in the Roots of the Northeast Brazilian Species *Pombalia Calceolaria* L. *Carbohydrate polymers* **2016**, *149*, 391–398.
14. El-Kholy, W.M.; Aamer, R.A.; Ali, A.N.A. Utilization of Inulin Extracted from Chicory (*Cichorium Intybus* L.) Roots to Improve the Properties of Low-Fat Synbiotic Yoghurt. *Annals of Agricultural Sciences* **2020**, *65*, 59–67.
15. Sheikhzadeh, S.; Alizadeh, M.; Rezazad, M.; Hamishehkar, H. Application of Response Surface Methodology and Spectroscopic Approach for Investigating of Curcumin Nanoencapsulation Using Natural Biopolymers and Nonionic Surfactant. *Journal of food science and technology* **2016**, *53*, 3904–3915.
16. Ibekwe, C.A.; Oyatogun, G.M.; Esan, T.A.; Oluwasegun, K.M. Synthesis and Characterization of Chitosan/Gum Arabic Nanoparticles for Bone Regeneration. *Am. J. Mater. Sci. Eng* **2017**, *5*.
